### 939 Enterovaginal Fistula; Could It Be Gallstones?

S. Kapoor, M. Boshnaq, C. Wright

*Tunbridge Wells Hospital, Kent, United Kingdom*

This is a rare presentation of an impacted gallstone leading to a ileovaginal fistula. A 76-year old female presented with a 4 week history of faecal vaginal discharge and weight loss on a background of endometrial cancer treated with chemotherapy and radiotherapy 9 years ago. She was initially investigated with a pelvic MRI which showed a collection in the vaginal stump. A further abdominal and pelvic CT scan revealed a cholecystoduodenal fistula complicated by an ileovaginal fistula at the point of impaction. The patient underwent a laparotomy with small bowel resection and anastomosis. She was admitted to the intensive care unit post operatively and recovered well. There are no previous reports of a vaginal fistula caused by gallstone ileus. This case highlights a rare complication of gallstones in a patient who has undergone pelvic radiotherapy.
